# Supplementary material
Source: Elsevier journal article supplement (http://darchive.mblwhoilibrary.org/bitstream/handle/1912/7624/mmc1.xlsx)
Supplement: mmc1 [file mmc1.xlsx]

## Sheet: ReadMe
This file contains measurements of thorium isotopes (Th-232 and Th-230) made on seawater from Station ALOHA.
Please cite the original publication when using this data:
Hayes, C. T.; J. F. Fitzsimmons; E. A. Boyle; D. McGee; R. F. Anderson; R. Weisend; P. L. Morton; (Geochimica et Cosmochimca Acta, 2015).
Thorium isotopes tracing the iron cycle at the Hawaii Ocean Time-series station ALOHA.
Full references cited in spreadsheet:
Roy-Barman, M., Chen, J.H. and Wasserburg, G.J. (1996) 230Th-232Th systematics in the central Pacific Ocean: The sources and the fates of thorium. Earth Planet. Sci. Lett. 139, 351-363.
Boyle, E.A., Bergquist, B.A., Kayser, R.A. and Mahowald, N. (2005) Iron, manganese, and lead at Hawaii Ocean Time-series station ALOHA: Temporal variability and an intermediate water hydrothermal plume. Geochim. Cosmochim. Acta 69, 933-952.
Fitzsimmons, J.N. and Boyle, E.A. (2014) Assessment and comparison of Anopore and cross flow filtration methods for the determination of dissolved iron size fractionation into soluble and colloidal phases in seawater. Limnol. Oceanogr. Methods 12, 246-263.

## Sheet: Station ALOHA surface data
	Dissolved Th-232		Dissolved Fe/Th-232		Total Th-232		Total Fe/Th-232		Particulate Th-232		Particulate Fe/Th-232
Date	Th (fmol/kg)	error	Fe/Th (mol/mol)	error	Th (fmol/kg)	error	Fe/Th (mol/mol)	error	Th (fmol/kg)	error	Fe/Th (mol/mol)	error		References, Notes
1994-09-25	51.6431	8.8												Roy-Barman et al. 1996 (EPSL vol. 139, pp. 351-363)
1994-09-25	48.6541	2.5												Roy-Barman et al. 1996 (EPSL vol. 139, pp. 351-363)
1994-09-25	64.7615	3.5												Roy-Barman et al. 1996 (EPSL vol. 139, pp. 351-363)
1994-09-25					222.68	9.3								Roy-Barman et al. 1996 (EPSL vol. 139, pp. 351-363)
1994-09-25					194.118	4.3								Roy-Barman et al. 1996 (EPSL vol. 139, pp. 351-363)
1994-09-25					52.8055	2.1								Roy-Barman et al. 1996 (EPSL vol. 139, pp. 351-363)
1994-09-25					64.9275	2.8								Roy-Barman et al. 1996 (EPSL vol. 139, pp. 351-363)
1994-09-25					63.1009	2.8								Roy-Barman et al. 1996 (EPSL vol. 139, pp. 351-363)
1994-09-25					48.8202	2.5								Roy-Barman et al. 1996 (EPSL vol. 139, pp. 351-363)
1994-09-25					83.8578	2.98								Roy-Barman et al. 1996 (EPSL vol. 139, pp. 351-363)
1997-05-29					106.52	7.01949								Sample collected from MITESS mooring (see Boyle et al. 2005, vol. GCA 69, No. 4, pp. 933-952)
1997-09-11					63.8836	5.13674								Sample collected from MITESS mooring (see Boyle et al. 2005, vol. GCA 69, No. 4, pp. 933-952)
1997-11-06					70.2129	5.90543								Sample collected from MITESS mooring (see Boyle et al. 2005, vol. GCA 69, No. 4, pp. 933-952)
1998-01-28					40.9759	5.50557								Sample collected from MITESS mooring (see Boyle et al. 2005, vol. GCA 69, No. 4, pp. 933-952)
1998-04-08					139.833	7.33288								Sample collected from MITESS mooring (see Boyle et al. 2005, vol. GCA 69, No. 4, pp. 933-952)
1998-05-02					307.709	9.62213								Sample collected from MITESS mooring (see Boyle et al. 2005, vol. GCA 69, No. 4, pp. 933-952)
1998-07-05					267.77	8.94743								Sample collected from MITESS mooring (see Boyle et al. 2005, vol. GCA 69, No. 4, pp. 933-952)
1999-02-07					47.3007	5.3033								Sample collected from MITESS mooring (see Boyle et al. 2005, vol. GCA 69, No. 4, pp. 933-952)
1999-06-01					177.016	7.73189	10141	456.457						Sample collected from MITESS mooring (see Boyle et al. 2005, vol. GCA 69, No. 4, pp. 933-952)
1999-08-15					104.585	6.94143	10354.5	1235						Sample collected from MITESS mooring (see Boyle et al. 2005, vol. GCA 69, No. 4, pp. 933-952)
1999-09-14					64.2582	4.51568	11994.3	958.083						Sample collected from MITESS mooring (see Boyle et al. 2005, vol. GCA 69, No. 4, pp. 933-952)
1999-10-14					82.3125	5.31134	8178.23	2428.53						Sample collected from MITESS mooring (see Boyle et al. 2005, vol. GCA 69, No. 4, pp. 933-952)
2000-06-26					75.4327	4.46302								Sample collected from MITESS mooring (see Boyle et al. 2005, vol. GCA 69, No. 4, pp. 933-952)
2004-09-21					50.6376	4.07771								Sample collected from MITESS mooring (see Boyle et al. 2005, vol. GCA 69, No. 4, pp. 933-952)
2004-12-25					72.6165	4.14664								Sample collected from MITESS mooring (see Boyle et al. 2005, vol. GCA 69, No. 4, pp. 933-952)
2005-02-07					51.6898	3.82974								Sample collected from MITESS mooring (see Boyle et al. 2005, vol. GCA 69, No. 4, pp. 933-952)
1997-05-20					62.4215	3.89846								Sample collected with ship-based MITESS unit
1998-04-18					53.5719	4.25572								Sample collected with ship-based MITESS unit
1998-11-07					49.2174	4.00398	13875.7	1128.83						Sample collected with ship-based MITESS unit
1999-05-09					79.0808	4.47452	11349.9	3877.97						Sample collected with ship-based MITESS unit
2002-11-05					60.7964	4.31571	14649.1	1135.01						Sample collected with ship-based MITESS unit
2005-10-07					59.7778	4.04468	9092.96	994.536						Sample collected with ship-based MITESS unit
2006-03-11					51.7919	4.11824	37048.3	2962.85						Sample collected with ship-based MITESS unit
2006-04-01					91.3067	7.07837	13381	1097.12						Sample collected with ship-based MITESS unit
2007-06-09					60.431	4.35016	16158.7	1347.35						Sample collected with ship-based MITESS unit
2007-10-02					46.9446	4.14475	33284.8	2972.88						Sample collected with ship-based MITESS unit
2008-05-28					45.3965	4.25809	17292.6	1715.39						Sample collected with ship-based MITESS unit
2012-07-10									293.818	20.5673	3261.13	262.921		Sample collected on HOE-DYLAN
2012-07-10 12:00:00	89.1195	3.94841	4062.97	681.321										Sample collected on HOE-DYLAN. Combined July 9-12, 2012 for dissolved Th analysis
2012-07-11									154.944	10.846	6634.28	534.873		Sample collected on HOE-DYLAN
2012-07-12									83.8554	5.86988	14787.5	1192.21		Sample collected on HOE-DYLAN
2012-07-13									64.7903	4.53532	9299.5	749.75		Sample collected on HOE-DYLAN
2012-07-13 12:00:00	62.201	3.41628	4672.65	568.738										Sample collected on HOE-DYLAN. Combined July 13-16, 2012 for dissolved Th analysis
2012-07-14									55.1386	3.8597	12920.9	1041.71		Sample collected on HOE-DYLAN
2012-07-15									52.0198	3.64139	14515.1	1170.24		Sample collected on HOE-DYLAN
2012-07-16									bdl					Sample collected on HOE-DYLAN
2012-07-17									30.5343	2.1374	16427.2	1324.41		Sample collected on HOE-DYLAN
2012-07-18	49.0711	4.69437	7019.8	753.399										Sample collected on HOE-DYLAN. Combined July 17-19, 2012 for dissolved Th analysis
2012-07-18									38.2887	2.68021	19130.3	1542.33		Sample collected on HOE-DYLAN
2012-07-19									151.68	10.6176	3101.38	250.041		Sample collected on HOE-DYLAN
2012-07-20									45.3255	3.17278	10474.5	844.483		Sample collected on HOE-DYLAN
2012-07-21	52.89	0.837752												Sample collected on HOE-DYLAN
2012-07-21									27.9931	1.95952	8594.53	692.913		Sample collected on HOE-DYLAN
2012-07-22									31.1832	2.18283	7490.46	603.9		Sample collected on HOE-DYLAN
2012-07-23	74.5197	2.80489	3788.24	543.487										Sample collected on HOE-DYLAN. Combined July 21-25, 2012 for dissolved Th analysis
2012-07-23									20.1988	1.41392	16510.5	1331.12		Sample collected on HOE-DYLAN
2012-07-24									22.362	1.56534	27844	2244.85		Sample collected on HOE-DYLAN
2012-07-25									24.9035	1.74325	17039.2	1373.74		Sample collected on HOE-DYLAN
2012-08-06									43.285	3.02995	18638	1502.64		Sample collected on HOE-DYLAN
2012-08-07	49.5116	4.77567	3669.71	402.625										Sample collected on HOE-DYLAN. Combined Aug 6-8, 2012 for dissolved Th analysis
2012-08-07									20.6259	1.44382	33083.8	2667.3		Sample collected on HOE-DYLAN
2012-08-08									34.8926	2.44248	21994.3	1773.24		Sample collected on HOE-DYLAN
2012-08-09									43.9086	3.0736	32026	2582.02		Sample collected on HOE-DYLAN
2012-08-09 12:00:00	52.8194	8.15946	13962.4	3771.27										Sample collected on HOE-DYLAN. Combined Aug 9-10, 2012 for dissolved Th analysis
2012-08-10									26.3263	1.84284	30914.3	2492.39		Sample collected on HOE-DYLAN
2012-08-11									54.1003	3.78702	10967.7	884.242		Sample collected on HOE-DYLAN
2012-08-12	46.8122	5.73644	9438.89	4249.03										Sample collected on HOE-DYLAN. Combined Aug 11-13, 2012 for dissolved Th analysis
2012-08-12									42.945	3.00615	8854.63	713.883		Sample collected on HOE-DYLAN
2012-08-13									31.0746	2.17522	6173.15	497.695		Sample collected on HOE-DYLAN
2012-08-23									29.2217	2.04552	53040.5	4276.26		Sample collected on HOE-DYLAN
2012-08-24	64.134	4.58293	4139.47	1423.58										Sample collected on HOE-DYLAN. Combined Aug 23-25, 2012 for dissolved Th analysis
2012-08-24									9.98933	0.699253	41925.2	3380.12		Sample collected on HOE-DYLAN
2012-08-25									31.8494	2.22946	10257.1	826.954		Sample collected on HOE-DYLAN
2012-08-26									15.4706	1.08294	12839.4	1035.15		Sample collected on HOE-DYLAN
2012-08-27									24.2062	1.69444	21521.1	1735.08		Sample collected on HOE-DYLAN
2012-08-28									14.7993	1.03595	21955.3	1770.09		Sample collected on HOE-DYLAN
2012-08-28									9.76345	0.683441	29629.8	2388.83		Sample collected on HOE-DYLAN
2012-08-28 12:00:00	52.3049	3.39308	6546.83	1356.82										Sample collected on HOE-DYLAN. Combined Aug 27-30, 2012 for dissolved Th analysis
2012-08-29									22.1044	1.54731	19460.3	1568.94		Sample collected on HOE-DYLAN
2012-08-30									15.9132	1.11392	20906.5	1685.54		Sample collected on HOE-DYLAN
2012-08-31									138.045	9.66318	6718.24	541.642		Sample collected on HOE-DYLAN
2012-09-01									bdl					Sample collected on HOE-DYLAN
2012-09-01 12:00:00	45.7928	4.88022	7576.77	1404.45										Sample collected on HOE-DYLAN. Combined Aug 31-Sept 2, 2012 for dissolved Th analysis
2012-09-02									16.9068	1.18347	22507.4	1814.61		Sample collected on HOE-DYLAN
2012-09-03									19.1394	1.33976	21101.6	1701.27		Sample collected on HOE-DYLAN
2012-09-04	49.0201	5.12099	6017.6	2173.29										Sample collected on HOE-DYLAN. Combined Sept 3-5, 2012 for dissolved Th analysis
2012-09-04									25.8675	1.81072	8243.22	664.59		Sample collected on HOE-DYLAN
2012-09-05									30.3721	2.12604	9651.44	778.124		Sample collected on HOE-DYLAN
2012-09-06									19.4299	1.36009	12885.5	1038.86		Sample collected on HOE-DYLAN
2012-09-07	45.0547	4.7777	5499.11	1312.04										Sample collected on HOE-DYLAN. Combined Sept 6-8, 2012 for dissolved Th analysis
2012-09-07									35.1769	2.46238	15293.7	1233.02		Sample collected on HOE-DYLAN
2012-09-08									56.1127	3.92789	4378.63	353.016		Sample collected on HOE-DYLAN
2013-05-24	36.7003	1.65103												Sample collected on HOE-PhoR I
2013-05-25 12:00:00	52.55	3.58152	5655.53	1452.18										Sample collected on HOE-PhoR I. Combined May 24-27, 2013 for dissolved Th analysis
2013-05-29 12:00:00	54.0591	3.51089	4272.3	1250.92										Sample collected on HOE-PhoR I. Combined May 28-31, 2013 for dissolved Th analysis
2013-06-02	49.3404	1.72539												Sample collected on HOE-PhoR I
2013-06-02 12:00:00	57.3124	3.88577	4452.14	1399.48										Sample collected on HOE-PhoR I. Combined June 1-4, 2013 for dissolved Th analysis
2013-09-19	50.3348	1.63321												Sample collected on HOE-PhoR II
2013-09-19 12:00:00	36.5947	5.14661	4687.32	683.766										Sample collected on HOE-PhoR II. Combined Sept 18-21, 2013 for dissolved Th analysis
2013-09-25	46.8871	4.78187	3314.69	672.216										Sample collected on HOE-PhoR II. Combined Sept 24-26, 2013 for dissolved Th analysis
2013-09-26	35.1045	1.55538												Sample collected on HOE-PhoR II
2014-03-13					44.2665	6.78196								Sample collected on HOE-BOE I
2014-03-23					108.505	6.90806								Sample collected on HOE-BOE I

## Sheet: Profiles
												Ingrowth Corrected		Detritus Corrected		Th Residence Time		Dissolved Th-232 Flux
	LAT	LON	Depth	CTDPRS	CTDTMP	CTDSAL	CTDOXY	CTDCHL	Date Collected	Diss. Th-232	error	Diss. Th-230	error	Diss. Th-230 xs	error	(depth-integrated)		(depth-integrated)
Cruise	DEG(N)	DEG(W)	m	DBAR	DEG C	PSS-78	UMOL/KG	UG/L	dd-mm-yy	fmol/kg		µBq/kg		µBq/kg		yrs		nmol/m2/yr
KM12-15	22.809	158.032	4.37232	4.4	25.16	35.295	207.1	0.1359	2012-07-21	54.2034	0.858555	0.592614	0.0269807	0.551966	0.0296086
KM12-15	22.809	158.032	24.0466	24.2	24.725	35.293	208.2	0.1022	2012-07-21	89.327	1.29867	0.641787	0.026684	0.571751	0.0339632
KM12-15	22.809	158.032	74.6147	75.1	23.541	35.315	218.2	0.2437	2012-07-21	57.5753	1.18271	0.537471	0.0398945	0.493689	0.0420011
KM12-15	22.809	158.032	135.002	135.9	21.992	35.354	208.5	0.6049	2012-07-21	39.0513	0.72821	0.665486	0.0319095	0.636989	0.0330348	1.18168	0.036769	7.19096	0.23098
KM12-15	22.809	158.032	173.827	175	20.43	35.219	203.8	0.1587	2012-07-21	41.0827	0.74446	0.811949	0.0355921	0.782161	0.0366968	1.27122	0.0315271	7.94018	0.204656
KM12-15	22.809	158.032	248.279	250	15.022	34.409	199.2	0.0354	2012-07-21	50.441	0.848881	1.46787	0.0459359	1.43175	0.0471967	1.64633	0.0313707	8.25469	0.165164
KM12-15	22.809	158.032	496.656	500.4	6.933	34.067	88.1	0.0196	2012-07-21	66.6664	1.04655	3.53218	0.0717933	3.48498	0.0731761	3.7006	0.060203	7.70522	0.135532
KM12-15	22.809	158.032	743.15	749.2	4.849	34.297	23.3	0.2436	2012-07-21	64.8279	1.0474	5.96521	0.0965821	5.91958	0.0975473	6.16904	0.0734954	7.31788	0.0973541
KM12-15	22.807	158.038	991.133	999.8	4.145	34.466	38.9	0.1546	2012-07-25	38.4349	1.10945	8.03888	0.16044	8.01194	0.160644	8.76917	0.0904983	6.64636	0.0782544
KM12-15	22.807	158.038	1385.36	1398.8	3.023	34.558	61	0.1518	2012-07-25	44.9502	0.852574	11.6136	0.169937	11.5821	0.170199	12.9046	0.122466	5.82344	0.0647341
KM12-15	22.807	158.038	1484.84	1499.6	2.842	34.568	65.4	0.1506	2012-07-25	48.5017	0.898464	12.1198	0.171429	12.0858	0.171731	13.9244	0.120294	5.7395	0.0587802
KM12-15	22.807	158.038	1978.08	2000.1	2.159	34.613	87	0.1466	2012-07-25	54.1803	0.94153	14.8759	0.281845	14.838	0.282075	18.4248	0.15701	5.74797	0.0573408
KM12-15	22.807	158.038	2223.93	2250	1.943	34.629	94.8	0.145	2012-07-25	63.954	1.04267	17.0438	0.227944	16.999	0.228339	20.5644	0.157615	5.87458	0.0530562
KM12-15	22.807	158.038	2469.99	2500.4	1.778	34.642	102.4	0.1442	2012-07-25	59.0994	0.924889	18.7807	0.241967	18.7393	0.242285	22.7395	0.157371	5.99585	0.0492534
KM12-15	22.807	158.038	2714.89	2749.9	1.654	34.654	110.4	0.143	2012-07-25	59.8259	1.24137	21.7732	0.318166	21.7313	0.318414	25.0194	0.159672	6.04676	0.0461653
KM12-15	22.807	158.038	2959.9	2999.8	1.575	34.661	117.4	0.1424	2012-07-25	88.8861	1.34586	21.9426	0.281924	21.8803	0.282542	27.2283	0.162112	6.2428	0.0446659
KM12-15	22.807	158.038	3449.69	3500.2	1.493	34.675	131	0.1419	2012-07-25	101.437	1.45365	29.192	0.356227	29.1209	0.356864	31.9426	0.182511	6.81879	0.0469751
KM12-15	22.807	158.038	3937.42	3999.6	1.467	34.681	140.9	0.142	2012-07-25	148.245	2.07152	30.172	0.379484	30.0681	0.380762	36.6668	0.20028	7.64429	0.05064
KM12-15	22.807	158.038	4425.06	4500	1.49	34.684	145.7	0.1435	2012-07-25	176.702	2.51403	31.2714	0.433491	31.1475	0.435082	40.6041	0.213476	8.90534	0.0571357
KM13-09	22.75	157.999	5	5.2	26.015	34.944	207.6	0.1076	2013-05-24	37.6117	1.69203	1.10651	0.0288482	1.07959	0.0299579	2.4748	0.0846524
KM13-09	22.75	158	5.0679	5.1	25.564	34.93	203.9	0.0727	2013-06-02	20.1734	1.94731	1.20413	0.0306993	1.18987	0.0309959
KM13-09	22.75	158	24.6428	24.8	25.33	34.987	205.2	0.0868	2013-06-02	50.5656	1.76823	1.14617	0.0285439	1.10969	0.0305701
KM13-09	22.75	158	75.7077	76.2	23.224	35.207	213.9	0.1845	2013-06-02	34.239	1.68609	1.2095	0.0295416	1.18509	0.0304356
KM13-09	22.75	158	119.013	119.8	22.398	35.417	213.6	0.4412	2013-06-02	25.4275	1.72397	1.54338	0.0297666	1.52541	0.0302508	2.78866	0.043906	1.59688	0.0436728
KM13-09	22.75	158	173.927	175.1	21.115	35.287	202.4	0.307	2013-06-02	37.6221	1.65504	1.81351	0.0318565	1.78684	0.032846	3.10523	0.0380832	2.00616	0.0458692
KM13-09	22.75	158	247.784	249.5	17.179	34.707	196.1	0.079	2013-06-02	56.1987	1.68636	1.66106	0.0304818	1.62083	0.032784	3.3466	0.0349282	2.92384	0.0541971
KM13-09	22.75	158	496.5	500.2	7.93	34.214	73.3	0.084	2013-06-01	65.7769	1.65766	3.66933	0.0408998	3.6228	0.0432167	4.74025	0.0505844	5.34792	0.0911551
KM13-09	22.75	158	644.8	649.9	5.867	34.224	41	0.0922	2013-06-01	62.2793	1.68153	5.42444	0.0539463	5.38058	0.0555275	6.09828	0.0531423	5.75479	0.0802223
KM13-09	22.75	158	793.6	800.2	4.642	34.343	35.2	0.0918	2013-06-01	62.2096	1.64483	5.81557	0.0584805	5.77179	0.0599374	7.43392	0.0561413	5.99935	0.0726275
KM13-09	22.75	158	991.9	1000.6	3.932	34.459	48.3	0.0895	2013-06-01	56.8727	1.54481	7.33059	0.0679418	7.29064	0.0689904	9.04492	0.0615872	6.27033	0.0681442
KM13-09	22.75	158	1188.9	1199.9	3.507	34.528	57.8	0.0889	2013-06-01	65.7857	1.62014	8.92548	0.0771132	8.87929	0.0783483	10.723	0.0666683	6.44527	0.0637029
KM13-09	22.75	158	1387.5	1401	3.058	34.552	67.1	0.0887	2013-06-01	84.0404	1.61414	13.8436	0.141266	13.7847	0.142369	13.0342	0.0765276	6.47372	0.0585155
KM13-16	22.75	158	4.5	4.5	26.874	35.488	199.5	0.0912	2013-09-26	35.9762	1.59401	1.12092	0.0289509	1.0952	0.029274
KM13-16	22.75	158	24.3	24.5	26.822	35.488	199.7	0.1767	2013-09-26	37.4288	1.62529	1.34674	0.0315572	1.32006	0.0319111
KM13-16	22.75	158	50.3	50.6	26.796	35.489	199.3	0.2717	2013-09-26	39.9535	1.62709	1.34661	0.0353258	1.3181	0.035577
KM13-16	22.75	158	70.5	71	23.959	35.376	220.3	0.4712	2013-09-26	33.0682	1.56094	1.25991	0.0307956	1.23637	0.0310045
KM13-16	22.75	158	119.4	120.2	21.264	35.283	205	0.8673	2013-09-26	31.1575	1.5995	1.40708	0.0371644	1.38497	0.0371585	2.9068	0.173205	1.48355	0.0918305
KM13-16	22.75	158	173	174.2	18.697	34.925	196.3	0.1302	2013-09-26	40.1176	1.68684	1.66686	0.0312441	1.63835	0.0318395	3.08133	0.128847	2.03566	0.0907006
KM13-16	22.75	158	247.5	249.2	14.498	34.417	199.3	0.0467	2013-09-26	51.1767	1.73861	2.4868	0.0434279	2.45052	0.0441176	3.58275	0.107608	2.72479	0.0899505
KM13-16	22.75	158	495.7	499.4	7.448	34.093	109.3	0.0694	2013-09-26	60.4118	1.67747	3.95539	0.0450951	3.91273	0.0463701	5.54537	0.0990279	4.32302	0.0980792
KM13-16	22.75	158	645.6	650.7	5.078	34.159	54.2	0.0824	2013-09-26	63.1116	1.64356	5.60728	0.0634235	5.56284	0.0642957	6.87243	0.0970348	4.87063	0.0883345
KM13-16	22.75	158	794.5	801.1	4.484	34.349	39.9	0.0858	2013-09-26	56.7454	1.78049	7.04058	0.0750552	7.00072	0.0755716	8.38542	0.0990006	5.08382	0.07845
KM13-16	22.75	158	992.2	1000.9	3.92	34.462	48.6	0.0833	2013-09-26	51.0891	1.70804	8.32632	0.0709014	8.29048	0.0714033	10.3379	0.102642	5.18174	0.0700853
KM13-16	22.75	158	1189.2	1200.2	3.481	34.52	58.3	0.0812	2013-09-26	50.5419	1.69466	10.1427	0.0866088	10.1073	0.0869537	12.2485	0.105732	5.21213	0.0634985
KM13-16	22.75	158	1386.9	1400.4	3.091	34.55	65.7	0.0801	2013-09-26	48.828	1.67171	11.212	0.0929004	11.1778	0.0931804	14.1086	0.108647	5.23941	0.0586011

## Sheet: Ultrafiltration results
Ultrafiltration Measurements
			232Th (fmol/kg)	±	230Th (µBq/kg)*	±	Weight SW	Concentration			*Corrected for ingrowth by 234U decay, but not for detrital source
Date	Depth						filtrered (kg)	Factor
2013-09-19	15	10kDa Permeate	47.6513	2.16144	1.08242	0.0329524	4.0509	1.76449
2013-09-19	15	10kDa Retentate	49.2236	1.63586	1.24215	0.0289495	5.29882
2013-09-19	15	Diss. (0.45 µm)	51.5932	1.67404	1.29723	0.0296719
2013-09-19	130	10kDa Permeate	27.2998	1.99128	1.16972	0.0306865	4.29891	1.95121
2013-09-19	130	10kDa Retentate	37.8998	1.90372	1.38257	0.0313853	4.51939
2013-09-19	130	Diss. (0.45 µm)	31.0788	1.6579	1.28433	0.033493
2013-09-22	1000	10kDa Permeate	41.3081	1.9634	6.44081	0.0684242	4.43391	2.10964
2013-09-22	1000	10kDa Retentate	56.1302	2.2111	8.82154	0.0774004	3.99579
2013-09-22	1000	Diss. (0.45 µm)	55.0696	1.72943	8.41194	0.0705544
Calculations for Calculating Colloidal Th concentrations (units for 232Th and 230Th same as above)
	Dissolved (fmol/kg)		Soluble (fmol/kg)		Colloidal (by diff.) (fmol/kg)		Colloidal (by retn.) (fmol/kg)		Apparent Recovery (%)		%Colloidal (of dissolved)			Notes
Depth	232Th	±	232Th	±	232Th	±	232Th	±		±	232Th	±
15	51.5932	1.67404	47.6513	2.16144	3.94189	2.7339	0.891114	1.53625	94.0869	5.97804	7.64034	5.30476		For more information on colloidal calculations, see Fitzsimmons and Boyle 2014 (Limnol. Oceanogr. Methods)
130	31.0788	1.6579	27.2998	1.99128	3.77899	2.59111	5.43251	1.41188	105.32	9.6569	12.1594	8.36241
1000	55.0696	1.72943	41.3081	1.9634	13.7615	2.61646	7.02587	1.40166	87.7689	5.17562	24.9893	4.81556
	Dissolved (µBq/kg)		Soluble (µBq/kg)		Colloidal (by diff.) (µBq/kg)		Colloidal (by retn.) (µBq/kg)		Apparent Recovery (%)		%Colloidal (of dissolved)
Depth	230Th	±	230Th	±	230Th	±	230Th	±		±	230Th	±
15	1.29723	0.0296719	1.08242	0.0329524	0.214811	0.0443428	0.0905233	0.0248586	90.419	3.79501	16.5591	3.43918
130	1.28433	0.033493	1.16972	0.0306865	0.114606	0.0454251	0.109086	0.0224958	99.5702	3.93943	8.9234	3.54452
1000	8.41194	0.0705544	6.44081	0.0684242	1.97114	0.0982843	1.1285	0.0489697	89.9829	1.25306	23.4326	1.1848
